# Supplementary material for: Systematic characterization of the conformation and dynamics of budding yeast chromosome XII
Source: PubMed Central journal article supplement — J Cell Biol. 2013 Jul 22;202(2):201–10. doi: 10.1083/jcb.201208186 (PMC3718979; doi:10.1083/jcb.201208186), 2013-07-22
Supplement: supp_jcb.201208186_JCB_201208186_sm.pdf [file supp_jcb.201208186_JCB_201208186_sm.pdf]

Albert et al., <http://www.jcb.org/cgi/content/full/jcb.201208186/DC1>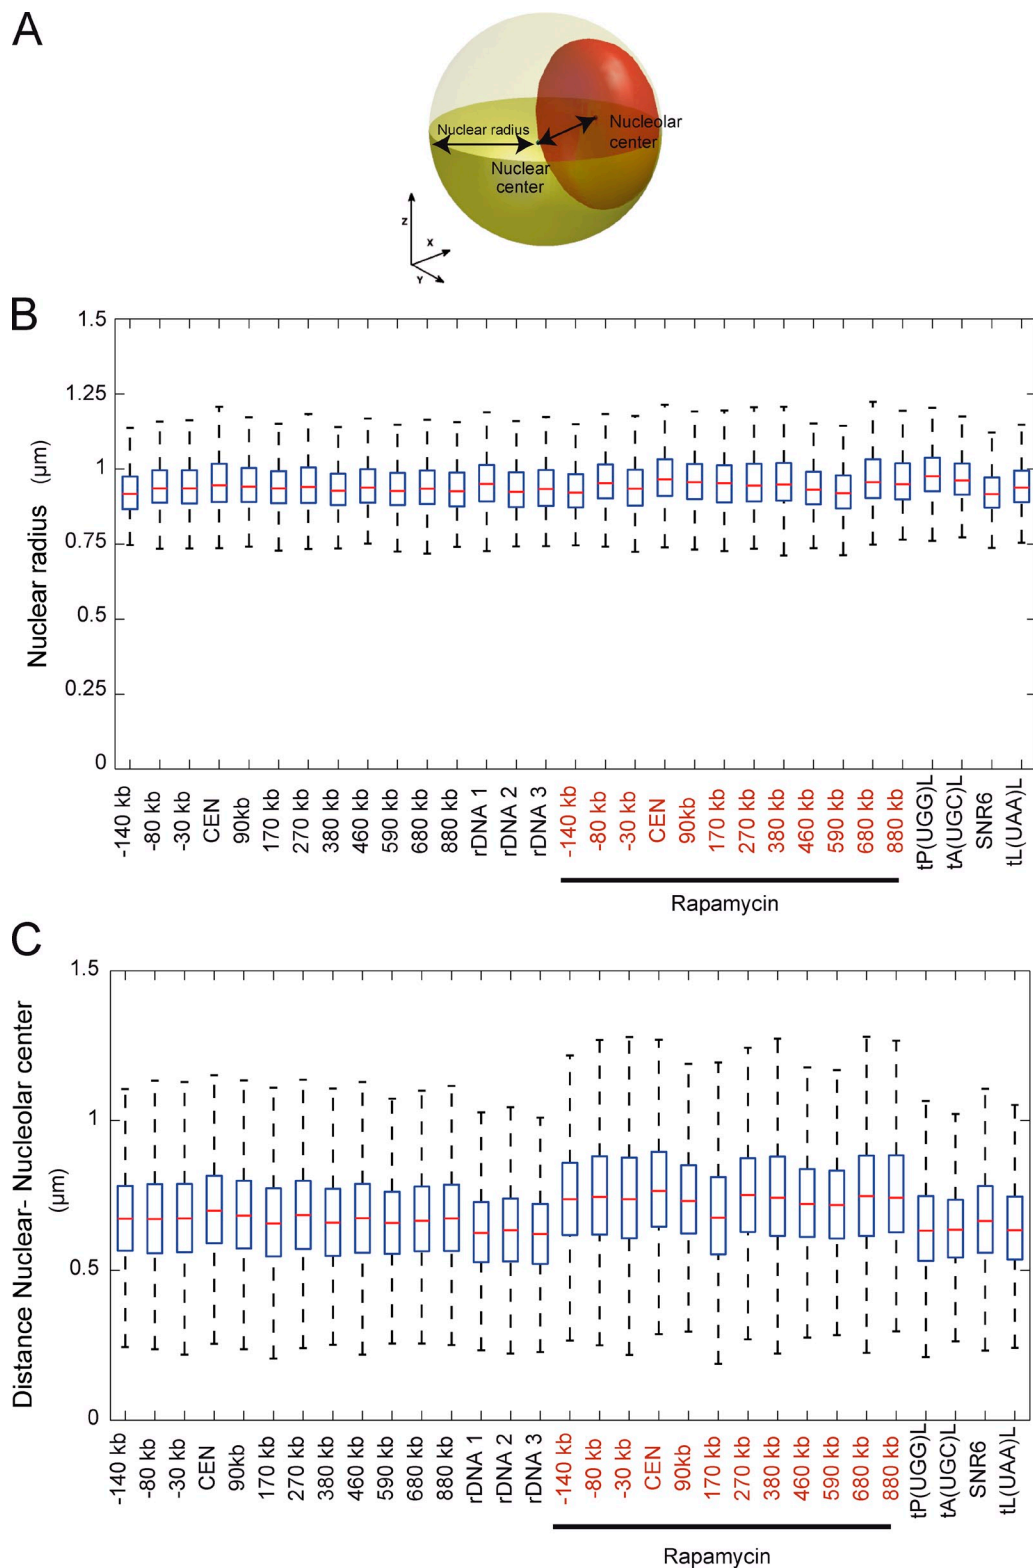

Figure S1. **Nuclear morphology of the 31 populations analyzed encompassing 15 FROS-tagged strains in exponentially growing cells, 10 rapamycin-treated FROS strains for 20 min, and four exponentially growing strains bearing FROS-labeled Pol III-transcribed genes along yeast chromosome XII.** (A) Schematic representation of nuclear radius and distances separating nuclear and nucleolar centers in the cell population measured in 3D using the gene map method (Berger et al., 2008). (B and C) Box plot of nuclear radius (B) and distance between nuclear-nucleolar centers (C) in each of the 31 populations analyzed are shown. Nuclear morphology is comparable in each cell population, except for an increase in nuclear-nucleolar center distances when rapamycin treatment is applied

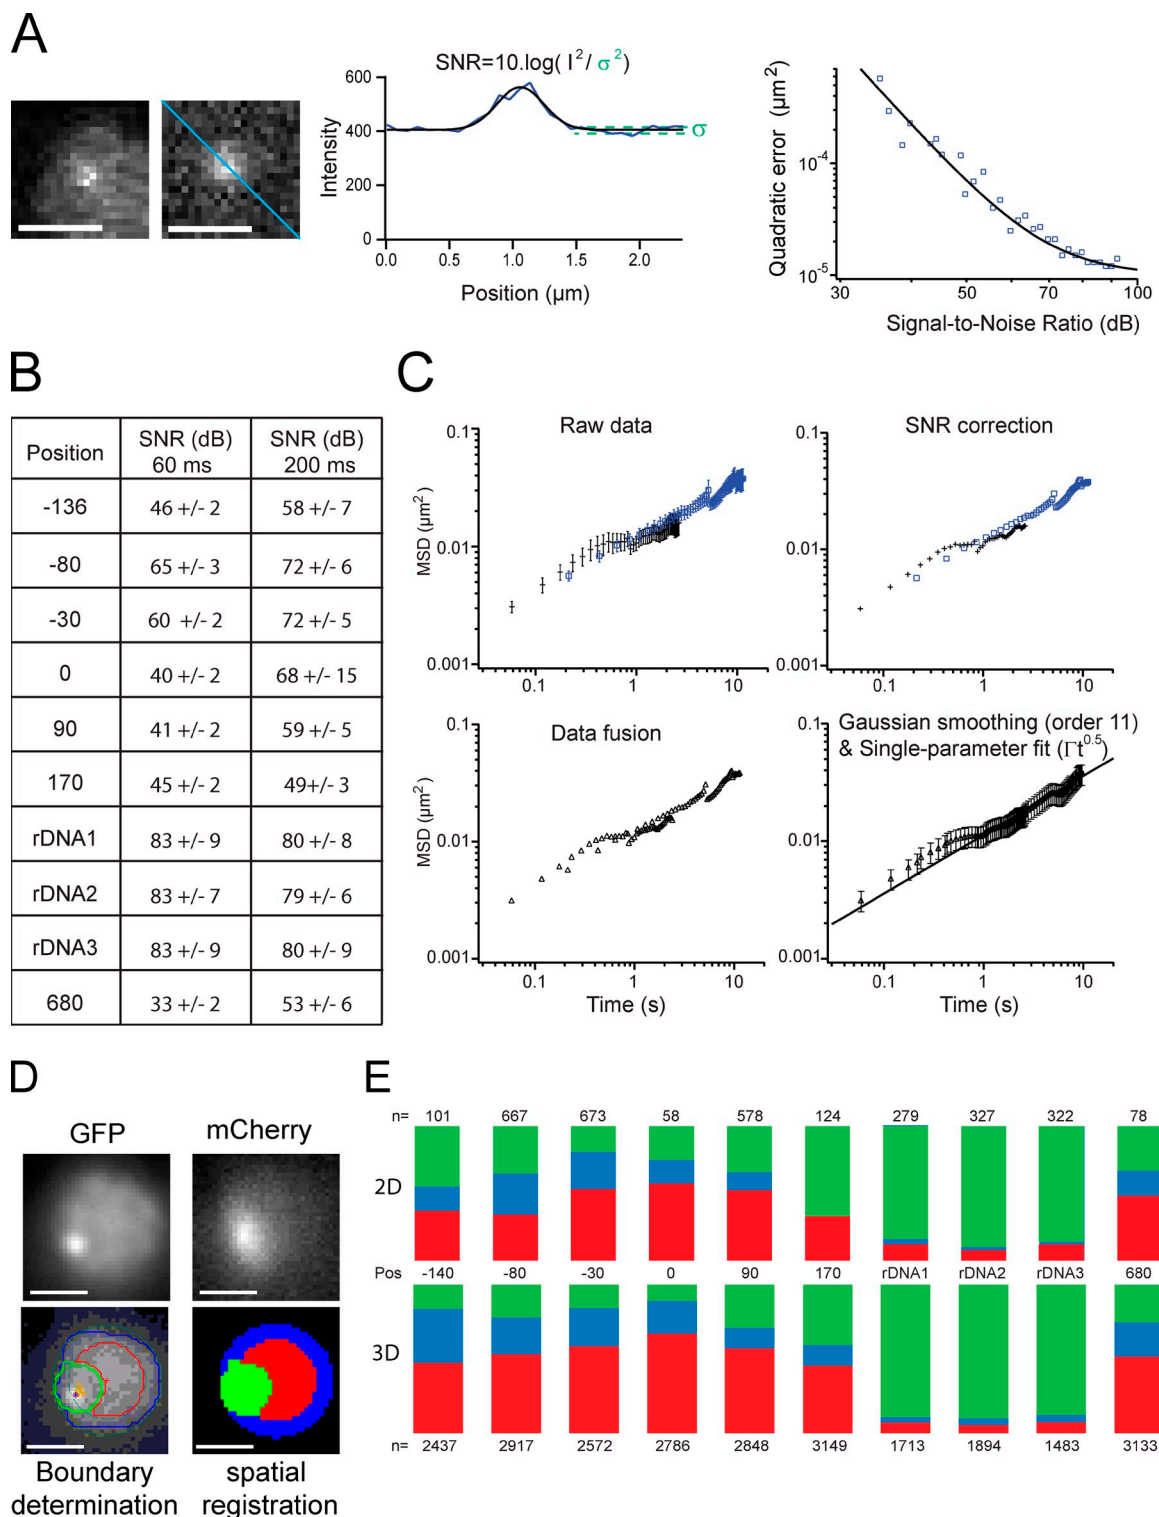

Figure S2. **Tracking loci in living cells.** (A) Our approach to evaluating the SNR and its impact on single particle tracking. Fluorescent loci appear as point-like structures, as shown in the left image. Such images can be generated in silico (second image), after the definition of the background and the maximal intensity of the tracer (bars, 1  $\mu\text{m}$ ). The intensity along the blue line in the image is represented in the middle panel, and the definition of the SNR is appended in the inset. We then compare the quadratic localization error by measuring the difference in position between the simulated object and the measurement derived from the software (plot on the right), and show that the localization error is reduced as the SNR increases (the line is a guide to the eye). Robustness of measurements is illustrated by individual in silico detection (blue boxes). (B) In the table, the measured SNR from time-lapse acquisitions is reported for each locus, and for fast (60 ms) or slow (200 ms) acquisitions. (C) For locus -136 (central localization, shown in Fig. S3), we show the process flow to generate MSD, starting from raw data with the error bars (top left). We then compensate for the difference in SNR according to our calibration presented in A (note that the variations in localization errors between the acquisitions at different acquisition rates are minimal) and fuse the datasets (bottom left). We finally filter the fused data with the error bars using Gaussian smoothing (order 11; bottom), and fit the data with a model of anomalous diffusion (black line). (D) Spatial registration of cell nucleus based on two-color imaging of GFP-Tet and mCherry-Nop1 signals. For each cell, the nucleus is automatically segmented with the Canny filter to define central, peripheral, and nucleolar regions, respectively, as red, blue, and green regions. Note that the three nuclear regions were defined as: the region delimited by a circle of  $1.1 \times$  the NUC radius for the NUC, the region located at distances  $< 0.31 \times$  the nuclear radius from the periphery for the peripheral location, and the remaining region for the center (right). (E) The proportion of trajectories found in nucleolar, central, or peripheral regions using the tracking software (top) is compared with the proportion of loci determined in 3D with the gene map method (Berger et al., 2008). In the case of gene maps, note that loci are considered to be nucleolar when positioned within 100 nm from segmented NUC, peripheral if  $< 100$  nm from the NE, and otherwise central.

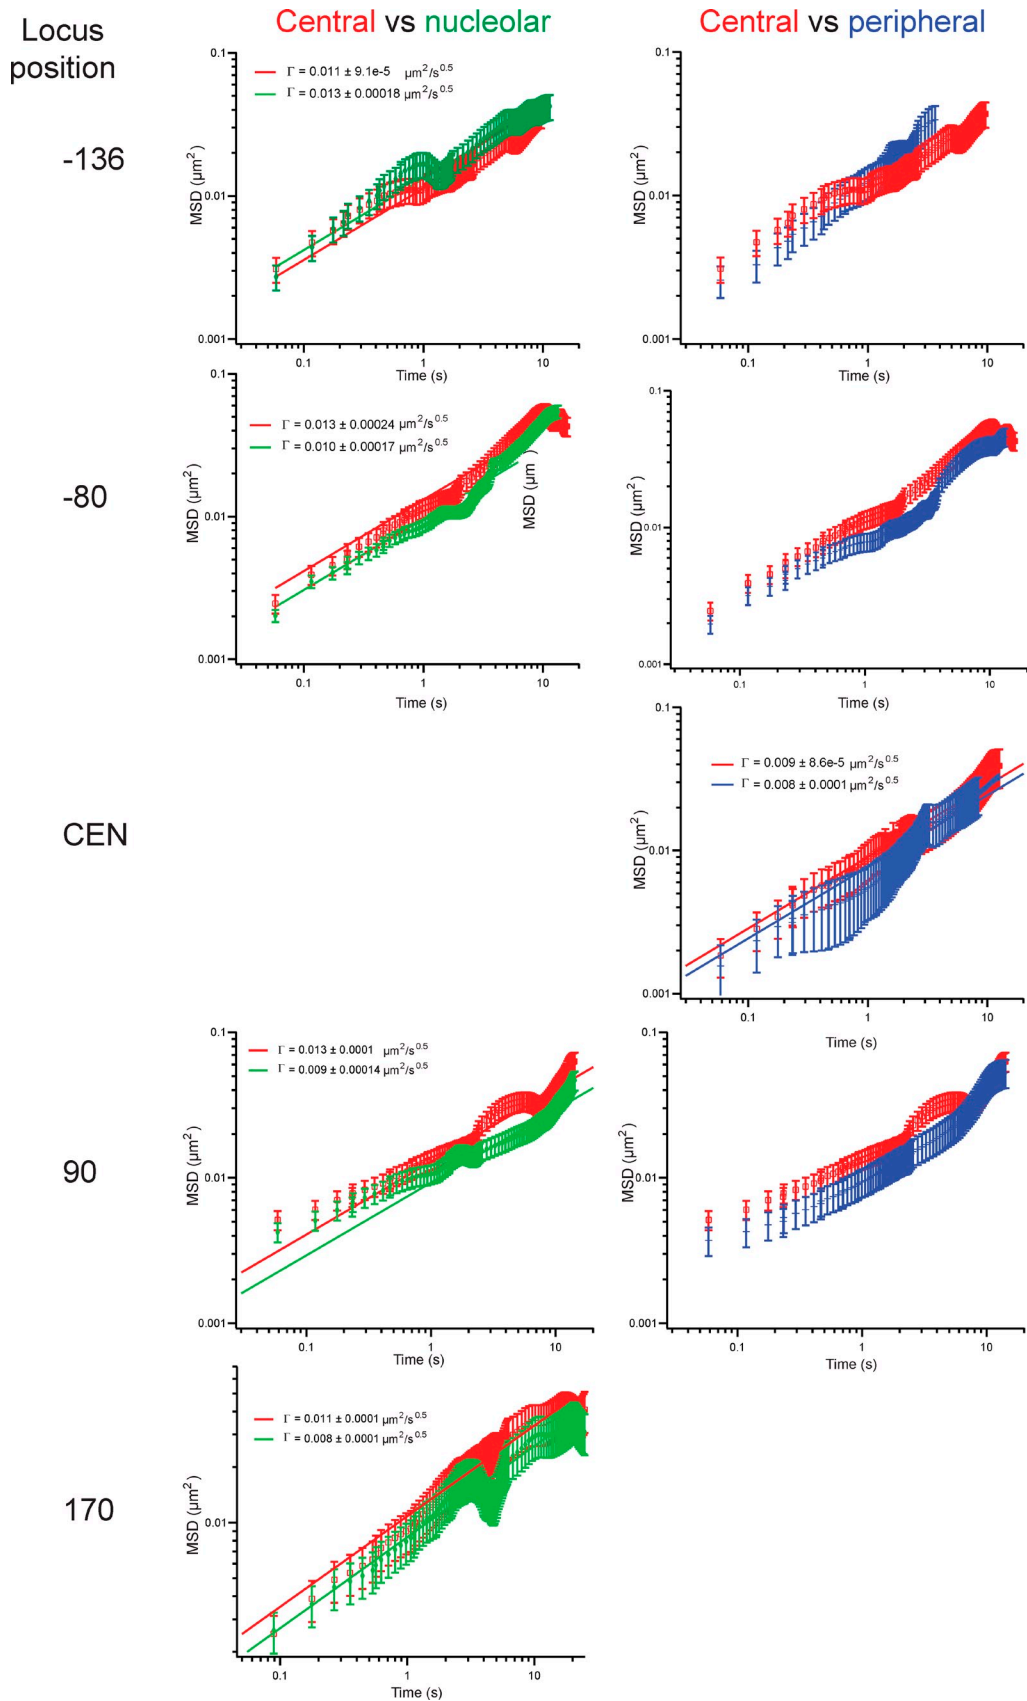

Figure S3. **MSD responses for loci –136 kb, –80 kb, CEN, 90 kb, and 170 kb along chromosome XII.** On the left, we plotted the MSD response for a central or nucleolar localization (red and green datasets, respectively). The same plot for a central and a peripheral localization is shown on the right (red and blue dataset, respectively). These data were adjusted with an anomalous diffusion model with one adjustable parameter in  $t^{0.5}$ . Note that the MSD datasets for genes located at –30 kb, 680 kb, and in the rDNA are represented in Fig. 4. Nucleolar and peripheral trajectories were not obtained for loci CEN and 170, respectively.

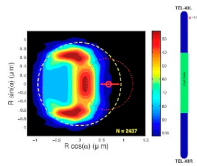

Video 1. **Overlay of color-coded statistical mapping of loci positions along chromosome XII.** The spatial distributions of each locus are represented as a color-coded heat map determined by the percentile of the distribution (Berger et al., 2008; Therizols et al., 2010). The dashed yellow circle, the dashed red circle, and the small, solid red circle depict the median NE, the median NUC, and the median location of the nucleolar center, respectively. Chromosome XII with the 12 FROS-labeled loci is schematically represented using the centromere as the origin (right). Time delay between each statistical mapping is proportional to distances in kilobases separating each locus. The overlay was generated using After Effects CS6 (Adobe).

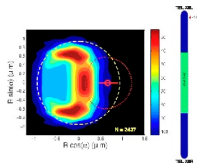

Video 2. **Interpolation between color-coded statistical maps of loci positions along chromosome XII.** Interpolation along the entire chromosome was achieved for each percentile color level independently, using After Effects CS6 software (Adobe). One statistical map with 1-kb resolution was then obtained for the entire chromosome, excluding rDNA. The dashed yellow circle, the dashed red circle, and the small, solid red circle depict the median NE, the median NUC, and the median location of the nucleolar center, respectively.

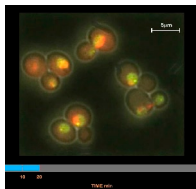

Video 3. **Long-term motion of one locus of chromosome XII in budding yeast.** The *S. cerevisiae* strain (HBT24-1a) bears one labeled locus (position 90 kb), a GFP-tagged nuclear pore complex labeling nuclear envelope (Nup49-GFP), and a red nucleolar marker (mCherry-Nop1). Images were acquired by time-lapse microscopy, using a wide-field microscope (Ti-E/B; Nikon). Frames for GFP were taken every 10 s. Bright-field and mCherry signals were acquired every 100 s. For visualization purposes, red and bright-field images were refreshed every 10 GFP frames. The movie was set to 24 images per second, resulting in an apparent 240-fold speed increase. Note that nuclear size increases with cell cycle progression, and that nuclei move rapidly during mitosis. Images were processed for visualization (see Material and methods).

Table S1. Yeast strains

| FROS position/<br>genome position | FROS position/<br>CEN as origin | Name               | Genotype                                                                                                                                                       | Origin                               |
|-----------------------------------|---------------------------------|--------------------|----------------------------------------------------------------------------------------------------------------------------------------------------------------|--------------------------------------|
| WT                                | WT                              | ODN1-1a<br>Nucloc2 | <i>MATa his3Δ1 leu2Δ0 met15Δ0 ura3Δ0 trp1Δ0</i><br><i>MATa his3Δ0 leu2Δ1 ura3-Δ851 ade2-801 lys2-Δ202::GFP::TETR-<br/>LYS2 nup49Δ::HPH-MX3 + pASZ11-NupNop</i> | This study<br>Berger et al.,<br>2008 |
| Untagged                          | Untagged                        | TMS1_1a            | <i>MATa his3-Δ1, leu2-Δ1, ura3-Δ0, ade2-801, lys2-801,LYS2::TETR-<br/>GFP, nup49-Δ::HPH-MX6 + pASZ11-NupNop</i>                                                | Offspring of<br>ODN1-1a x<br>NucLoc2 |
| Chr XII –014 kb                   | Chr XII –136 kb                 | Ben1_2a            | <i>MATa his3-Δ1, leu2-Δ1, ura3-Δ0, ade2-801, lys2-801,LYS2::TETR-<br/>GFP, nup49-Δ::HPH-MX6, interPAU18-AYT1::his3::TetO-NAT +<br/>pASZ11-NupNop</i>           | This study                           |
| Chr XII 070 kb                    | Chr XII –80 kb                  | Jez15_1a           | <i>MATa his3-Δ1, leu2-Δ1, ura3-Δ0, ade2-801, lys2-801,LYS2::TETR-<br/>GFP, nup49-Δ::HPH-MX6, interGRC3-RIX7::ura3::TetO-NAT +<br/>pASZ11-NupNop</i>            | This study                           |
| Chr XII 120 kb                    | Chr XII –30 kb                  | ICH5_1a            | <i>MATa his3-Δ1, leu2-Δ1, ura3-Δ0, ade2-801, lys2-801,LYS2::TETR-<br/>GFP, nup49-Δ::HPH-MX6, interYLL014w-YLL013c::TetO-NAT +<br/>pASZ11-NupNop</i>            | This study                           |
| Chr XII 150 kb                    | Chr XII 0 kb                    | Jez11_1a           | <i>MATa his3-Δ1, leu2-Δ1, ura3-Δ0, ade2-801, lys2-801,LYS2::TETR-<br/>GFP, nup49-Δ::HPH-MX6, interDNM1-cen::his3::TetO-NAT +<br/>pASZ11-NupNop</i>             | This study                           |
| Chr XII 240 kb                    | Chr XII 90 kb                   | HBT24_1a           | <i>MATa his3-Δ1, leu2-Δ1, ura3-Δ0, ade2-801, lys2-801,LYS2::TETR-<br/>GFP, nup49-Δ::HPH-MX6, interYLR048W-YLR049C::his3::TetO-Nat<br/>+ pASZ11-NupNop</i>      | This study                           |
| Chr XII 320 kb                    | Chr XII 170 kb                  | Ben3_1a            | <i>MATa his3-Δ1, leu2-Δ1, ura3-Δ0, ade2-801, lys2-801,LYS2::TETR-<br/>GFP, nup49-Δ::HPH-MX6, interYLR092w-YLR093c::his3::TetO-NAT<br/>+ pASZ11-NupNop</i>      | This study                           |
| Chr XII 420 kb                    | Chr XII 270 kb                  | HBT27_1a           | <i>MATa his3-Δ1, leu2-Δ1, ura3-Δ0, ade2-801, lys2-801,LYS2::TETR-<br/>GFP, nup49-Δ::HPH-MX6, interYLR143w-YLR144c::ura3::TetO-Nat<br/>+ pASZ11-NupNop</i>      | This study                           |
| Chr XII 530 kb                    | Chr XII 380 kb                  | Jez14_1a           | <i>MATa his3-Δ1, leu2-Δ1, ura3-Δ0, ade2-801, lys2-801,LYS2::TETR-<br/>GFP, nup49-Δ::HPH-MX6, interYLR188w-YLR189c::ura3::TetO-NAT+<br/>pASZ11-NupNop</i>       | This study                           |
| Chr XII 610 kb                    | Chr XII 460kb                   | HBT28_1a           | <i>MATa his3-Δ1, leu2-Δ1, ura3-Δ0, ade2-801, lys2-801,LYS2::TETR-<br/>GFP, nup49-Δ::HPH-MX6, interYLR238W-YLR239C::his3::TetO-Nat<br/>+ pASZ11-NupNop</i>      | This study                           |
| Chr XII 740 kb                    | Chr XII 590 kb                  | Ben5_1a            | <i>MATa his3-Δ1, leu2-Δ1, ura3-Δ0, ade2-801, lys2-801,LYS2::TETR-<br/>GFP, nup49-Δ::HPH-MX6, interYLR307w-YLR307c-a::his3::TetO-NAT<br/>+ pASZ11-NupNop</i>    | This study                           |
| Chr XII 830 kb                    | Chr XII 680 kb                  | Jez1_1a            | <i>MATa his3-Δ1, leu2-Δ1, ura3-Δ0, ade2-801, lys2-801,LYS2::TETR-<br/>GFP, nup49-Δ::HPH-MX6, interYLR353w-YLR354c::his3::TetO-NAT<br/>+ pASZ11-NupNop</i>      | This study                           |
| Chr XII 1,030 kb                  | Chr XII 880 kb                  | HBT30_1a           | <i>MATa his3-Δ1, leu2-Δ1, ura3-Δ0, ade2-801, lys2-801,LYS2::TETR-<br/>GFP, nup49-Δ::HPH-MX6, interYLR451w-YLR452c::his3::TetO-NAT<br/>+ pASZ11-NupNop</i>      | This study                           |
| ChrXII-rDNA1                      | Chr XII-rDNA                    | Ben51_1a           | <i>MATa his3-Δ1, leu2-Δ0, C, ura3-Δ0, ade2-801, lys2801,LYS2::TETR-<br/>GFP, nup49-Δ::HPH-MX6 inter rDNA ura3::TetO-NAT+ pASZ11-<br/>NupNop</i>                | This study                           |
| ChrXII-rDNA2                      | Chr XII-rDNA                    | Ben52_1a           | <i>MATa his3-Δ1, leu2-Δ0, C, ura3-Δ0, ade2-801, lys2801,LYS2::TETR-<br/>GFP, nup49-Δ::HPH-MX6 inter rDNA ura3::TetO-NAT+ pASZ11-<br/>NupNop</i>                | This study                           |
| ChrXII-rDNA3                      | Chr XII-rDNA                    | Ben57_1a           | <i>MATa his3-Δ1, leu2-Δ0, C, ura3-Δ0, ade2-801, lys2801,LYS2::TETR-<br/>GFP, nup49-Δ::HPH-MX6 inter rDNA ura3::TetO-NAT+ pASZ11-<br/>NupNop</i>                | This study                           |
| SNR6                              | Chr XII 210 kb                  | yCNOD15-1c         | <i>MATa his3-Δ1, leu2-Δ0, ura3-Δ0, ade2-801, lys2-801,LYS2::TETR-<br/>GFP, nup49-Δ::HPH-MX6 interSNR6-YLR108c::his3::TetO-NATMX6<br/>+ pASZ11-NupNop</i>       | This study                           |
| tP(UGG)L                          | Chr XII –60 kb                  | yCNOD123-1a        | <i>MATa his3-Δ1, leu2-Δ1, ura3-Δ0, ade2-801, lys2-801,LYS2::TETR-<br/>GFP, nup49-Δ::HPH-MX6, inter tP(UGG)L-PAU17::his3::TetO-Nat +<br/>pASZ11-NupNop</i>      | This study                           |
| tA(UGC)L                          | Chr XII 60 kb                   | yCNOD124-1a        | <i>MATa his3-Δ1, leu2-Δ1, ura3-Δ0, ade2-801, lys2-801,LYS2::TETR-<br/>GFP, nup49-Δ::HPH-MX6, inter tA(UGC)L-MLH2::ura3::TetO-Nat +<br/>pASZ11-NupNop</i>       | This study                           |
| tL(UAA)L                          | Chr XII 810 kb                  | yCNOD125-1a        | <i>MATa his3-Δ1, leu2-Δ1, ura3-Δ0, ade2-801, lys2-801,LYS2::TETR-<br/>GFP, nup49-Δ::HPH-MX6, inter tL(UAA)L-YLR419w::ura3::TetO-Nat<br/>+ pASZ11-NupNop</i>    | This study                           |

Chr, chromosome; WT, wild type.

Table S2. **Oligonucleotides used in this study**

| Number | Name              | Genomic position              | Sequence (5'–3')                                                                                          |
|--------|-------------------|-------------------------------|-----------------------------------------------------------------------------------------------------------|
| 558    | chrXII-014K-M13F  | interPAU18-AYT1               | AATTCATCGTCTTATATTCGATAATAAAAACAATACAGTGAGCGTTGTTAATTAAGTAA<br>ATCATAGGCACCTGGTATCATGTAAAACGACGGCCAGT     |
| 559    | chrXII-014K-M13R  | interPAU18-AYT1               | TCAATAAGGAGATGAACTAGGCCATCAACAATTAACACGCACACACGCACCT<br>ACTACAACACTTGTATTTGAATTATGAAACAGCTATGACCATG       |
| 610    | o-chrXII-70k-M13F | interGRC3-RIX7                | CGTCATGAGACGTGGCCAATTCATGAAAAGATAGAAAAGAAAAGGTAATCGTAC<br>ATTTTTAATAGTGAAAAGATAGAGGATACAGTAAAACGACGGCCAGT |
| 611    | o-chrXII-70k-M13R | interGRC3-RIX7                | GTCCTAGAAGTTAGTATGACTTAGATATTGAAGGAATATGAGTATACATAACAAAT<br>ATATAAAACCTTTCATGATTTTTGGGAAACAGCTATGACCATG   |
| 560    | o-chrXII120k      | interYLL014W-YLL013C          | ACATGACAACAGTATTCTCAGTCAAATGATTTCAAATACACAATGTTAAATTCTCTAT<br>CTGTTGCAGAAATAAGAAGAGCGTAAAACGACGGCCAGT     |
| 561    | o-chrXII120k-rev  | interYLL014W-YLL013C          | ATATTCATTATTTGCTTTTTCCATTACCTACTTTTTGTACCTCATCTCTATTTTTCTGCAA<br>AATCTTTGCGCTCTTACGGAAACAGCTATGACCATG     |
| 606    | o-chrXII150k-M13F | interDNM1-cen                 | TTATAGGTCAGTGTATTCTTTACTCAGTTGATGATTTCAAATGTGCTCTCCTCTCC<br>ATCTTTTTCTTGTAAATAAAATGTA AACGACGGCCAGT       |
| 607    | o-chrXII150k-M13R | interDNM1-cen                 | GGTAGCTTCTCTAGTGAAGTTCTCTAGCTTAGTAAATCTTTGCGATTGCTAAT<br>ATTTGTTATTTAGTTATGGGAAACAGCTATGACCATG            |
| 562    | o-chrXII24k       | interYLR048W-YLR049C          | TTTTTATTAGGTAAGTGGTTTCAATAATTAATTTCTTAGCGGGAAGGCTGACTATCT<br>ATAGTATTGAAGATAAGTTAAGTAAAACGACGGCCAGT       |
| 563    | o-chrXII24krev    | interYLR048W-YLR049C          | AATACTCGGGTGAACCCGCATGGCGAATAGTGCAAATTTAATTAATAATAAAAAAT<br>GAAATATCAGAACTAAACATTAATGGAAACAGCTATGACCATG   |
| 564    | o-chrXII32k       | interYLR092W-YLR093C          | TCATAATGAGATAGACACTGTTTATAATAAGAATAATAGGTAGGATGGTGCCAT<br>CGTGAGCATATACATACCTATAAGTAAAACGACGGCCAGT        |
| 565    | o-chrXII32krev    | interYLR092W-YLR093C          | ACGACAATAACATTAATAACGGTTGTATTTCTTTGTTCCCTGAGAGGAAGAGAAAA<br>ATAAAATAAAAAAAGGTAATATGGAAACAGCTATGACCATG     |
| 566    | o-chrXII42k       | interYLR143W-YLR144C          | ATACGCTGTCCACGCTCCTGGCGGTGAAATGATAGACAGATCCCAAATATGTTA<br>GCAAATCATAGGAACAACACCATATGTAAAACGACGGCCAGT      |
| 567    | o-chrXII42krev    | interYLR143W-YLR144C          | TCCTAAACCATCATCAATAATCAAATTATTACAGAACACACCTTAATTGTGCGGCGT<br>ATCTAAATTTTACGTGTTACAGGAAACAGCTATGACCATG     |
| 568    | o-chrXII53k       | interYLR188W-YLR189C          | TCCTGTACGCCCTTATACACATTAATAATATAGATGCACAACATACGGTACGTTT<br>AGGAAACTCAAATTAAGCTTTAGTAAAACGACGGCCAGT        |
| 569    | o-chrXII53krev    | interYLR188W-YLR189C          | AAGTTTCAGTCATATTTGACTCAGGAAAGATAGAAAACGATAATGTTGATAATAA<br>GAATAATAGTAACAATAATGGAAACAGCTATGACCATG         |
| 570    | o-chrXII61k       | interYLR238W-YLR239C          | TTCCCCAACTAGCATCGTAAATACAAGACACACAGTCCGCTTTTCACGTCA<br>GAGATTATTATACGTACGTATATGTAAAACGACGGCCAGT           |
| 571    | o-chrXII61krev    | interYLR238W-YLR239C          | TCCGTGAGACGGATGACTCCCCCATACTTTCTTAAATGAAAGGATGCTTACCTTT<br>TTTACATGTGAATATCTATTACATGGAAACAGCTATGACCATG    |
| 572    | o-chrXII74k       | interYLR307W-YLR307C-A        | AGTATGTATTAGAATAGAGGACATATATAAAATCATATATATCGATGCTTGAATGTAT<br>AAGGAAAAGCGTCAAATTATGGTAAAACGACGGCCAGT      |
| 573    | o-chrXII74krev    | interYLR307W-YLR307C-A        | CTAAAAGATTCTAAAAAATTACTTTTTAAAGTTATACCCTCTGACTTTATGTGACATCA<br>GCATCCTAAGTACCTACCGTTGGAAACAGCTATGACCATG   |
| 574    | o-chrXII83k       | interYLR353W-YLR354C          | AAACTGTCTGTCTGTTAAAGTCATATATATAAATAGGGGATTTTCATTAATTTATATAT<br>ATAGATATACTTGTGTACAGTAAAACGACGGCCAGT       |
| 575    | o-chrXII83krev    | interYLR353W-YLR354C          | TTACCGCTTAAGGAAGTATCTCGGAAATATTAATTTAGGCCATGTCCTTATGCACGT<br>TTCTTTTGATACTACGGGTACAGGAAACAGCTATGACCATG    |
| 576    | o-chrXII1030k     | interYLR451W-YLR452C          | CAGACGGACTTAAACCGCCAACAGCCTTGCCACAGGTGTATGATGCGAAG<br>ATTCGTAAGCGCTCACGTTAGTCACATCGTAAAACGACGGCCAGT       |
| 577    | o-chrXII1030krev  | interYLR451W-YLR452C          | AGCGGAGGTGTGATTTGTATATCAACTATAATATGATTAATAAAGCCATTATTATCT<br>AGTATAATTTCCAATCTGAGGAAACAGCTATGACCATG       |
| 1033   | URA3_M13F-Scel    | Construction of SI-Scel-URA3. | AAAAAAGGATCCGGTATCGATAAGCTTGATGTATTACCCTGTTATCCCTAGCGTAT<br>GTGGCTGTGGTTTCAGGGTCCAT                       |
| 1034   | URA3_M13R         | Construction of SI-Scel-URA3. | TTTTGTGACCCCGGGCTGCAGGAATTCGATTGT                                                                         |
| 1035   | rDNA-M13F.        | Tagging of rDNA.              | AGCAGTTTTTCCGCACCATCAGAGCGGCAACATGAGTGCTGTATAAGTTTAA<br>AGAATTGAGAAAAGCTCATTCTATAGGTA AACGACGGCCAGT       |
| 1036   | rDNA-M13R         | Tagging of rDNA.              | TCACTGTTCACTTGTCTTACATCTTCTTGGTAAAATCGTAGTTTCGATATTTTTTT<br>CATATCAAAGGCATGCTCTGGGAAACAGCTATGACCATG       |
| 528    | o-M13F_SNR6       | interSNR6-YLR108c             | TGAATGTGAATATTGTACAGCTATGCAATGGTACGATCATACTCTGAACGATCCAT<br>TTAAATTATATGTAAAACGACGGCAGT                   |
| 529    | o-M13R_SNR6       | interSNR6-YLR108c             | GAAGGAATATTGCAAAATGATTGATTTCTGTGAAATCTTCAATAAAAAAACCTTTC<br>TCTTCTGTTGACGGAAACAGCTATGACCATG               |
| 1240   | tP(UGG)L-rev      | inter tP(UGG)L-PAU17          | GCACAAACTGAGGATCTCAGCCTTCTACGGCATAATCCTTTATAATTATTGTTTTA<br>GCCAGGAAACAGCTATGAC                           |



Table S2. **Oligonucleotides used in this study** (Continued)

| Number | Name               | Genomic position              | Sequence (5'–3')                                                                    |
|--------|--------------------|-------------------------------|-------------------------------------------------------------------------------------|
| 1241   | tP(UGG)L_fw        | inter tP(UGG)L-PAU17          | TTACAACAAATGGTATGCAATTCATAAAGCATAGGCCAAAAGACCCTGATACAGA<br>TATATGTAAAACGACGGCCAGT   |
| 1244   | tA(UGC)L-fw        | inter tA(UGC)L-MLH2           | ACAGTAAAAGCAAAAAAGCATTGTGCCAGGGCAATATAGCGAGCACTACTTAA<br>ACCCAAAGTAAAACGACGGCCAGT   |
| 1245   | tA(UGC)L-rev       | inter tA(UGC)L-MLH2           | GATTACCTTCTGCATTATCTATAAGTTTTGCGCATAACAAACCTTCACTTGTACCT<br>AACCAGGAAAACAGCTATGAC   |
| 1250   | tL(UAA)L-rev       | inter tL(UAA)L-YLR419w        | AAAGACAATGTGCTATGTAGTTTACGGGATTCTAGCCCTGATTCAGCAAAGAGA<br>AAAACACCAGGAAAACAGCTATGAC |
| 1251   | tL(UAA)L-fw        | inter tL(UAA)L-YLR419w        | CATATAGAAGTGTCAAAGTATAAAACACTAACAAAAATCTAAGAGATTATTGCGAC<br>TGCGGTAAAACGACGGCCAGT   |
|        | SNR6_HindIII_F     | Probe for IEL                 | AGCTTTAAAGGCTCTGATTTTGGATTCTG                                                       |
|        | SNR6_HindIII_R     | Probe for IEL                 | CACAGCATGGATACTGATGGTCTTGGT                                                         |
|        | SNR6               | Oligo For RT (98 bp product)  | TCTCTTTGTAACGGTTCATCCT                                                              |
|        | SNR14 (U4 control) | Oligo For RT (115 bp product) | GCGAACACCGAATTGACCATG                                                               |

Table S3. **Plasmids used in this study**

| Name                         | Reference           |
|------------------------------|---------------------|
| pTetO-Nat-HIS3 $\Delta$      | Berger et al., 2008 |
| pTetO-Nat-URA3 $\Delta$      | Berger et al., 2008 |
| pCR4-HIS3-M13                | Berger et al., 2008 |
| pSK-URA3-M13                 | Berger et al., 2008 |
| pASZ11-GFP-NUP49-NOP1-Cherry | Berger et al., 2008 |
| pSK-URA3-Scel-M13            | This study          |

## References

- Berger, A.B., G.G. Cabal, E. Fabre, T. Duong, H. Buc, U. Nehrass, J.C. Olivo-Marin, O. Gadal, and C. Zimmer. 2008. High-resolution statistical mapping reveals gene territories in live yeast. *Nat. Methods*. 5:1031–1037. <http://dx.doi.org/10.1038/nmeth.1266>
- Therizols, P., T. Duong, B. Dujon, C. Zimmer, and E. Fabre. 2010. Chromosome arm length and nuclear constraints determine the dynamic relationship of yeast sub-telomeres. *Proc. Natl. Acad. Sci. USA*. 107:2025–2030. <http://dx.doi.org/10.1073/pnas.0914187107>

**Codes (MATLAB scripts) of custom-made software tracking loci are available as a ZIP file.**
